# Supplementary material for: A 3D Multilevel Heterostructure Containing 2D Vertically Aligned MoS2 Nanosheets and 1D Sandwich C-MoS2-C Nanotubes to Enhance the Storage of Li+ Ions
Source: MDPI journal article supplement (doi:10.3390/nano13142088), 2023-07-18
Supplement: s1 [file s1]

## Supporting Information

### **A 3D Multilevel Heterostructure Containing 2D Vertically Aligned MoS<sub>2</sub> Nanosheets and 1D Sandwich C-MoS<sub>2</sub>-C Nanotubes to Enhance the Storage of Li<sup>+</sup> Ions**

Yiyang Zhao<sup>1</sup>, Wenhao Luo<sup>2</sup>, Huiqing Luo<sup>1</sup>, Xiaodi Liu<sup>1,\*</sup> and Wenjun Zheng<sup>2,\*</sup>

<sup>1</sup>College of Chemistry and Pharmaceutical Engineering, Nanyang Normal University, Nanyang 473061, China

<sup>2</sup>Department of Chemistry, Key Laboratory of Advanced Energy Materials Chemistry (MOE), College of Chemistry, Nankai University, Tianjin 300071, China

\*Correspondence: 20122029@nynu.edu.cn; zhwj@nankai.edu.cn

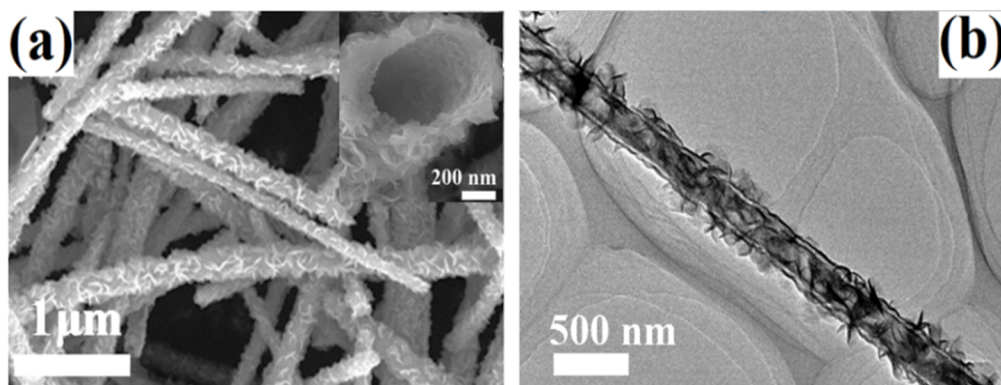

**Figure S1** (a) SEM and (b) TEM images of VANS-MoS<sub>2</sub>-NTs, and the inset of (a) is the high-magnified SEM image.

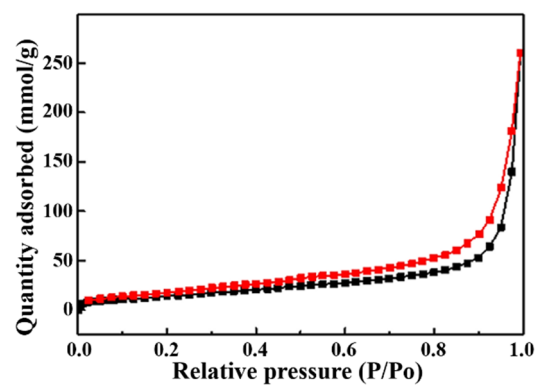

**Figure S2** N<sub>2</sub> adsorption/desorption isotherms of VANS-MoS<sub>2</sub>-CNTs.

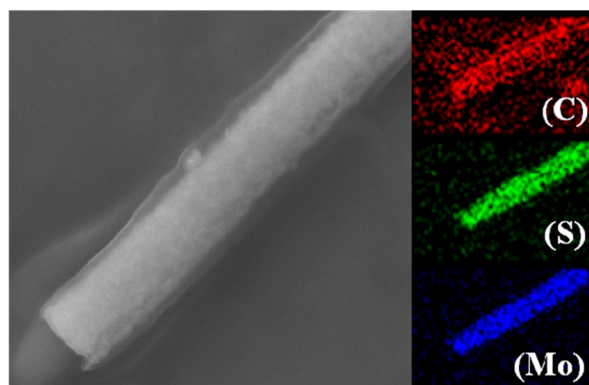

**Figure S3** SEM and EDS-mapping images of MoS<sub>2</sub> nanotubes covered by carbon under the high concentration of glucose solution.

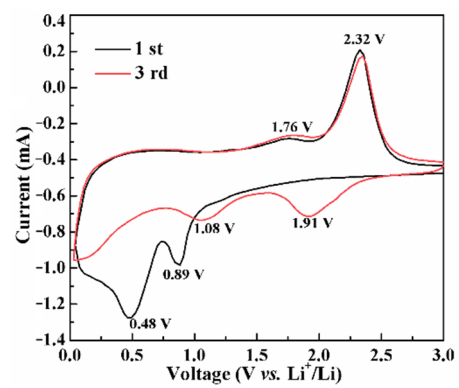

**Figure S4** CV curves for VANS-MoS<sub>2</sub>-CNTs at a scan rate of 0.2 mV/s.

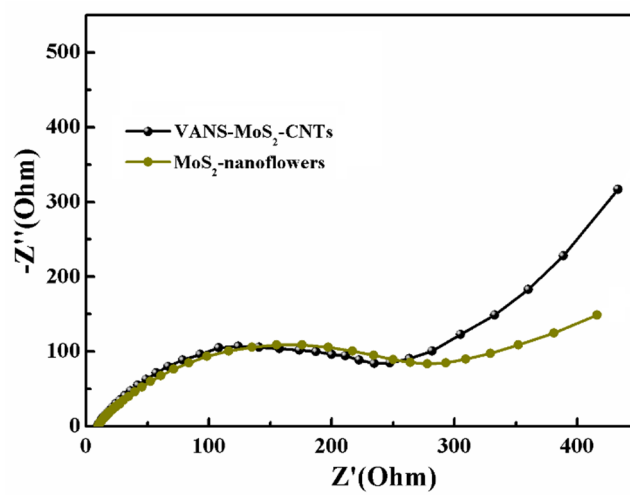

**Figure S5** Nyquist plots of VANS-MoS<sub>2</sub>-CNTs and MoS<sub>2</sub> nanoflowers.

**Table S1.** The comparison of the electrochemical performance of VANS-MoS<sub>2</sub>-CNTs and some other previously reported MoS<sub>2</sub>-based anodes for LIBs.

| Samples                                                             | Cycling stability<br>mAh/g-cycles-A/g | Rate capability<br>mAh/g-A/g | Ref.         |
|---------------------------------------------------------------------|---------------------------------------|------------------------------|--------------|
| VANS-MoS <sub>2</sub> -CNTs                                         | 1270-100-0.1                          | 730-2                        | In this work |
| C@MoS <sub>2</sub> nanoboxes                                        | 952/200/0.4                           | 689/2                        | [1]          |
| Carbon nanotube hybrids with MoC and MoS <sub>2</sub>               | 1200/200/0.1                          | 680/1                        | [2]          |
| Hollow microsphere@solid nanosphere MoS <sub>2</sub>                | 302/100/0.1                           | ca. 260/1                    | [3]          |
| Graphene quantum doped MoS <sub>2</sub> nanosheets                  | 1031/80/0.1                           | 660/5                        | [4]          |
| MoS <sub>2</sub> /N-graphene nanocomposites                         | 820/100/1                             | 700/2                        | [5]          |
| N-doped graphene/MoS <sub>2</sub> /N-doped graphene heterostructure | 552/600/1                             | 528/2                        | [6]          |
| MoS <sub>2</sub> -rGO/hollow carbon spheres network                 | 1145/100/0.1                          | 753/2                        | [7]          |

- [1] Yu, X.Y.; Hu, H.; Wang, Y.W.; Chen, H.Y.; Lou, X.W. Ultrathin MoS<sub>2</sub> nanosheets supported on N-doped carbon nanoboxes with enhanced lithium storage and electrocatalytic properties. *Angew. Chem. Int. Ed.* **2015**, *54*, 7395-7398.
- [2] Li, X.; Zhang, J.Y.; Wang, R.; Huang, H.Y.; Xie, C.; Li, Z.H.; Li, J.; Niu, C.M. In situ synthesis of carbon nanotube hybrids with alternate MoC and MoS<sub>2</sub> to enhance the electrochemical activities of MoS<sub>2</sub>. *Nano Lett.* **2015**, *15*, 5268-5272.
- [3] Guo, B.; Yu, K.; Song, H.; Li, H.; Tan, Y.; Fu, H.; Li, C.; Lei, X.; Zhu, Z. Preparation of hollow microsphere@onion-like solid nanosphere MoS<sub>2</sub> coated by a carbon shell as a stable anode for optimized lithium storage. *Nanoscale* **2016**, *8*, 420-430.
- [4] Guo, J.; Zhu, H.; Sun, Y.; Tang L.; Zhang, X. Boosting the lithium storage performance of MoS<sub>2</sub> with graphene quantum dots. *J. Mater. Chem. A* **2016**, *4*, 4783-4789.
- [5] Zhao, C.; Wang, X.; Kong, J.; Ang, J.M.; Lee, P.S.; Liu, Z.; Lu, X. Self-assembly-induced alternately stacked single-layer MoS<sub>2</sub> and N-doped graphene: A novel van der Waals heterostructure for lithium-ion batteries. *ACS Appl. Mater. Interfaces* **2016**, *8*, 2372-2379.
- [6] Chen, B.; Meng, Y.H.; He, F.; Liu, E.Z.; Shi, C.S.; He, C.N.; Ma, L.Y.; Li, Q.Y.; Li, J.J.; Zhao, N.Q. Thermal decomposition-reduced layer-by-layer nitrogen-doped graphene/MoS<sub>2</sub>/nitrogen-doped graphene heterostructure for promising lithium-ion batteries. *Nano Energy* **2017**, *41*, 154-163.
- [7] Hu, X.; Li, Y.; Zeng, G.; Jia, J.C.; Zhan, H.B.; Wen, Z.H. Three-dimensional network architecture with hybrid nanocarbon composites supporting few-layer MoS<sub>2</sub> for lithium and sodium storage. *ACS Nano* **2018**, *12*, 1592-1602.
